# Supplementary material for: The Metabolite Profile in Culture Supernatant of Aster yomena Callus and Its Anti-Photoaging Effect in Skin Cells Exposed to UVB
Source: Plants (Basel). 2021 Mar 30;10(4):659. doi: 10.3390/plants10040659 (PMC8066191; doi:10.3390/plants10040659)
Supplement: Supplementary file 1 [file plants-10-00659-s001.pdf]

Article

# The metabolite profile in culture supernatant of *Aster yomena* callus and its anti-photoaging effect in skin cells exposed to UVB

**Supplementary Figure S1:** Antioxidant activity of AYC-CS-E in cell-free condition. The antioxidant activity of AYC-CS-E and Vitamin C (Vit. C, 1 mM). Analysis of DPPH radical was performed as described in the *Materials and Methods* section. All bar graphs show the means  $\pm$  standard deviation (SD) of 3 samples. One representative plot out of three independent experiments is shown.

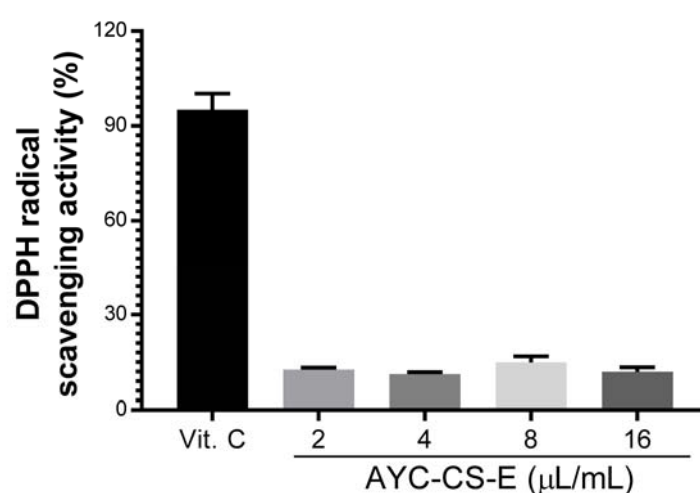

**Supplementary Figure S2:** Effect of AYC-CS-E and AYC-P-E treatment on cell viability, elastase inhibition, type I procollagen expression of UVB-irradiated HaCaT cells. **(a-c)** HaCaT cells were treated with various concentrations (2, 4, 8, or 16  $\mu\text{L/mL}$ ) of AYC-CS-E (30 mg/mL) and AYC-P-E (30 mg/mL) for 24 h after being exposed to 8 mJ/cm<sup>2</sup> UVB irradiation. **(a)** The cell viability for each conditions was measured using MTT assay. **(b; left panel)** Elastase inhibition levels were measured in each conditions via elastase substrate (N-STANA) treatment, as described in the *Materials and Methods* section. Type I procollagen levels **(b; right panel)** and TNF- $\alpha$  levels **(c)** in the culture supernatants were analyzed using each enzyme-linked immunosorbent assay (ELISA) kits. All bar graphs show the means  $\pm$  standard deviation (SD) of 3 samples. One representative plot out of three independent experiments is shown; \* $p < 0.05$ , \*\* $p < 0.01$ , or \*\*\* $p < 0.001$ .

**(a)**

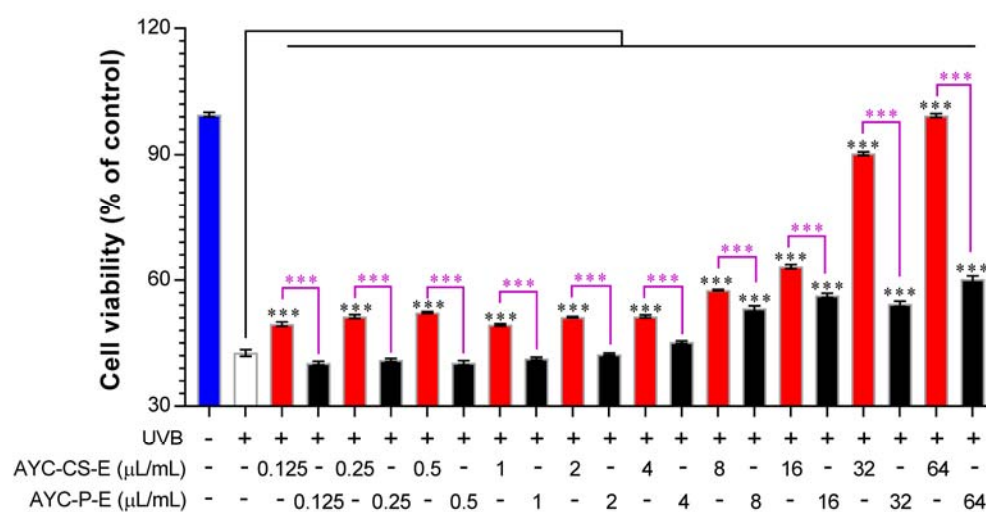

**(b)**

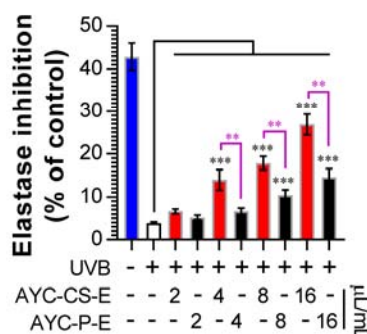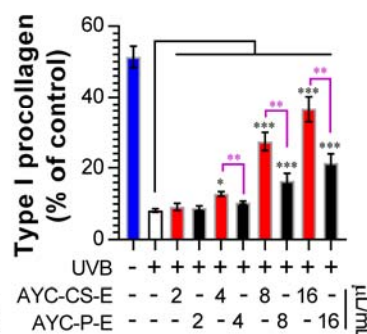

**(c)**

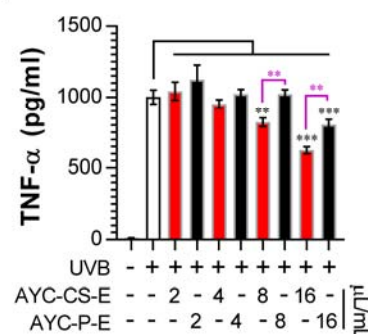

**Supplementary Figure S3:** Representative ultra-performance liquid chromatography-quadrupole-time-of-flight mass spectrometry (UPLC-QTOF/MS) extract (AYC-P-E) isolated from *Aster yomena* callus pellets. For analysis, the metabolites were analyzed with a BEH C18 column (2.1 × 100 mm, 1.7 μm). The eluted metabolites were analyzed by Q-TOF MS in ESI-positive mode. The UPLC-QTOF/MS chromatogram shows the following: 1, Robustic acid; 2, Delphinidin 3-arabinoside; 3, Pterosin C; 4, 3,4-Dicaffeoyl-1,5-quinolactone; 5, Pterosin P; 6, Acetylpterosin C; 7, Pterosin N; 8, L-Thyronine; 9, Dehydrophytosphingosine; 10, Dihydrosphingosine; 11, Phytosphingosine; 12, LysoPC(18:2); 13, α-Linolenic acid; 14 and 15, LysoPC(16:0); 16, LysoPC(18:1); 17, LysoPC(17:0); 18, Linoleoyl ethanolamide; 19, LysoPC(18:0); and 20, Oleamide.

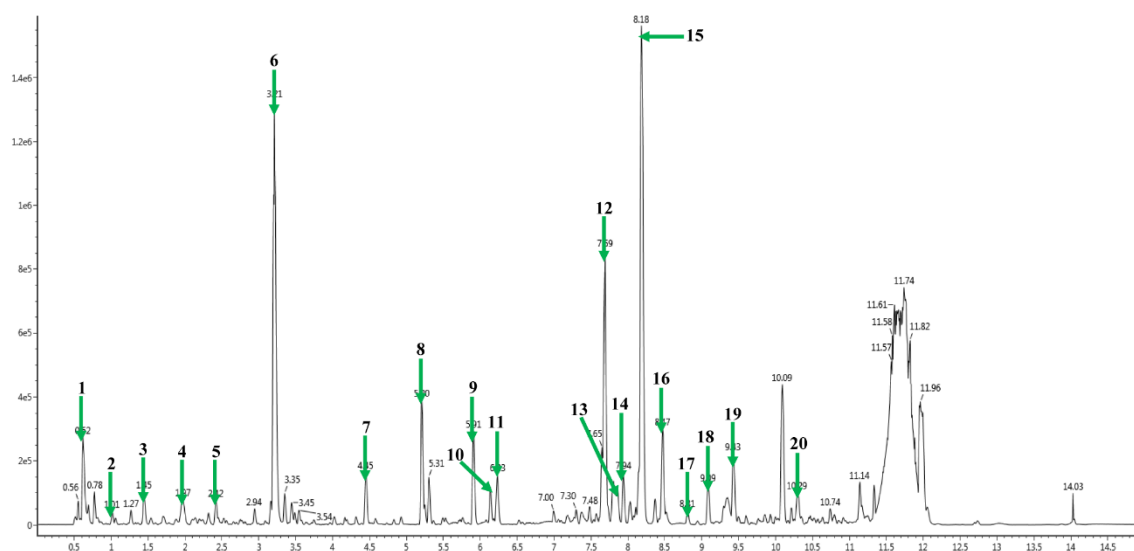

**Supplementary Table S1:** Identification of metabolites from AYC-CS-E and AYC-P-E analyzed by ESI-positive mode in UPLC-QTOF/MS

| No. | RT (min)                  | Identification                              | Exact mass (m/z) | Fragment ions (m/z)   | AYC-P-E | AYC-CS-E |
|-----|---------------------------|---------------------------------------------|------------------|-----------------------|---------|----------|
| 1   | 0.60 / 0.62               | Robustic acid                               | 381.07           | 349, 251, 233, 175    | O       | O        |
| 2   | 1.01                      | Delphinidin 3-arabinoside                   | 435.13           | 419, 115, 91          | O       | X        |
| 3   | 1.45                      | Pterosin C                                  | 235.10           | 217, 175, 147, 131    | O       | X        |
| 4   | 1.92 / 1.97               | 3,4-Dicaffeoyl-1,5-quinolactone             | 499.12           | 319, 163              | O       | O        |
| 5   | 2.42                      | Pterosin P                                  | 235.10           | 217, 191, 175, 147    | O       | X        |
| 6   | 3.18 / 3.21               | Acetylpteriosin C                           | 277.12           | 235, 217, 175, 131    | O       | O        |
| 7   | 4.42 / 4.45               | Pterosin N                                  | 235.09           | 217, 175, 147, 91     | O       | O        |
| 8   | 5.20 / 5.28               | L-Thyronine                                 | 274.27           | 256, 230              | O       | O        |
| 9   | 5.74                      | 3,5-Di-O-methyl-8-prenylafzelechin-4beta-ol | 387.18           | 147, 105              | X       | O        |
| 10  | 5.91 / 5.98               | Dehydrophytosphingosine                     | 316.28           | 298, 280              | O       | O        |
| 11  | 6.14                      | Dihydrosphingosine                          | 302.32           | 284                   | O       | X        |
| 12  | 6.23 / 6.28               | Phytosphingosine                            | 318.30           | 300, 282, 155         | O       | O        |
| 13  | 7.69                      | LysoPC(18:2)                                | 520.36           | 502, 337, 184, 104    | O       | O        |
| 14  | 7.78 / 7.83               | $\alpha$ -Linolenic acid                    | 279.24           | 261, 243, 109, 95, 81 | O       | O        |
| 15  | 7.93 / 7.94 / 8.17 / 8.18 | LysoPC(16:0)                                | 496.33           | 478, 313, 184, 104    | O       | O        |
| 16  | 8.45 / 8.47               | LysoPC(18:1)                                | 522.38           | 504, 184, 104         | O       | O        |
| 17  | 8.81                      | LysoPC(17:0)                                | 510.38           | 492, 184, 104         | O       | X        |
| 18  | 9.09                      | Linoleoyl ethanolamide                      | 324.30           | 306, 263              | O       | X        |
| 19  | 9.40 / 9.43               | LysoPC(18:0)                                | 524.36           | 506, 341, 184, 104    | O       | O        |
| 20  | 10.03                     | Palmitic amide                              | 256.26           | 186                   | X       | O        |
| 21  | 10.23 / 10.29             | Oleamide                                    | 282.27           | 265, 247              | O       | O        |
| 22  | 11.88                     | 13Z-Docosenamide                            | 338.34           | 321, 303              | X       | O        |
| 23  | 14.01                     | PC(18:2/16:0)                               | 758.57           | 575, 337, 184         | X       | O        |
